# Supplementary material for: SB365, Pulsatilla Saponin D Induces Caspase-Independent Cell Death and Augments the Anticancer Effect of Temozolomide in Glioblastoma Multiforme Cells
Source: Molecules. 2019 Sep 5;24(18):3230. doi: 10.3390/molecules24183230 (PMC6766801; doi:10.3390/molecules24183230)
Supplement: Supplementary file 1 [file molecules-24-03230-s001.pdf]

# **SB365, *Pulsatilla* Saponin D Induces Caspase-Independent Cell Death and Augments the Anticancer Effect of Temozolomide in Glioblastoma Multiforme Cells**

**Jun-Man Hong <sup>1</sup>, Jin-Hee Kim <sup>2</sup>, Hyemin Kim <sup>3</sup>, Wang Jae Lee <sup>1</sup> and Young-il Hwang <sup>1,\*</sup>**

<sup>1</sup> Department of Anatomy and Cell Biology, Seoul National University College of Medicine, Seoul 03080, Republic of Korea

<sup>2</sup> Department of Biomedical Laboratory Science, Cheongju University, Cheongju 28503, Republic of Korea

<sup>3</sup> Research Institute for Future Medicine, Samsung Medical Center, Seoul 06351, Republic of Korea

\* Correspondence: [hyi830@snu.ac.kr](mailto:hyi830@snu.ac.kr); Tel.: 822-740-8209; FAX.: 822-745-9528

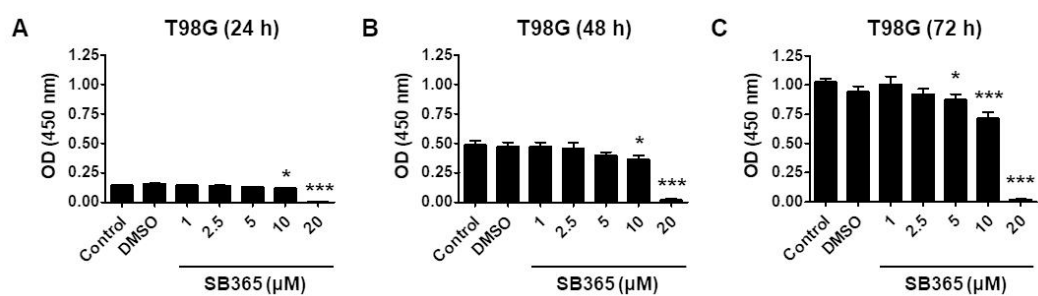

**Figure S1.** In vitro cytotoxic effect of SB365 on TMZ-resistant T98G cells.

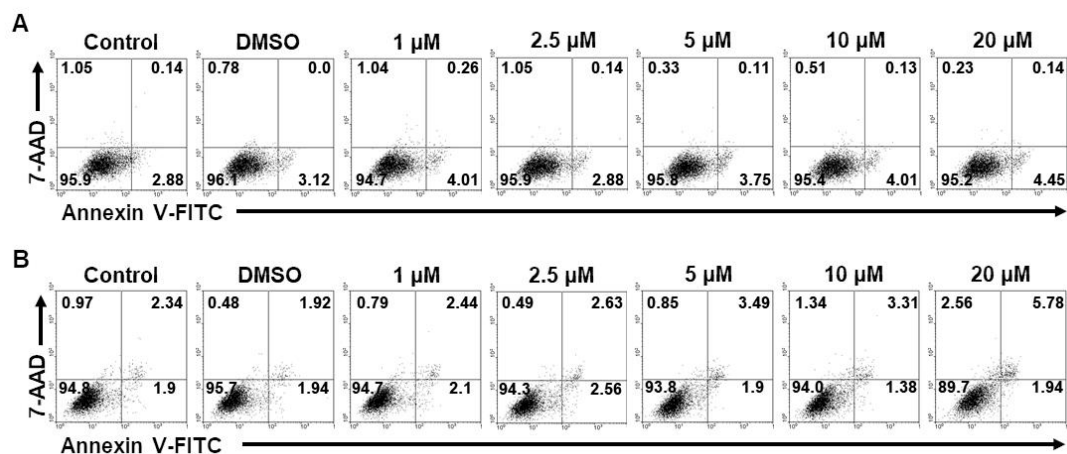

**Figure S2.** Cell death in U87-MG cells treated with SB365.

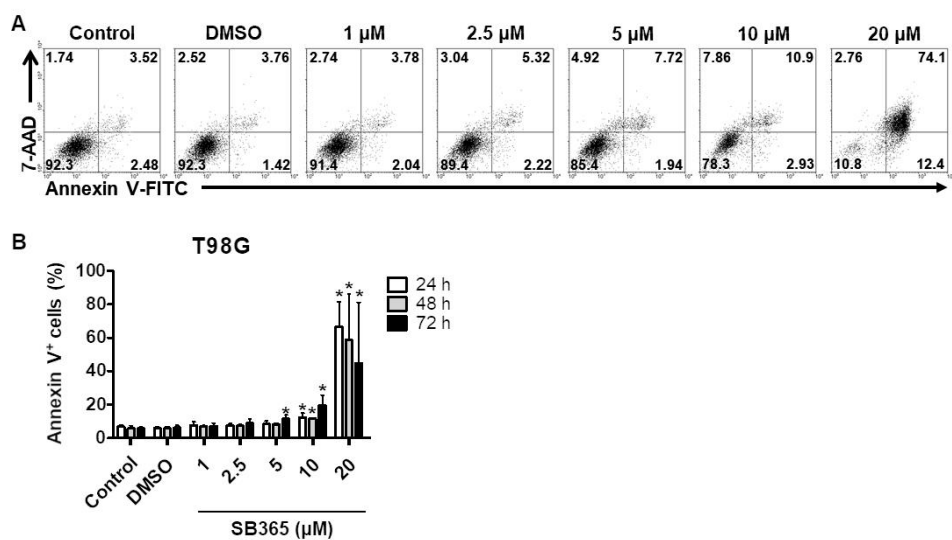

**Figure S3.** Cell death in T98G cells treated with SB365.

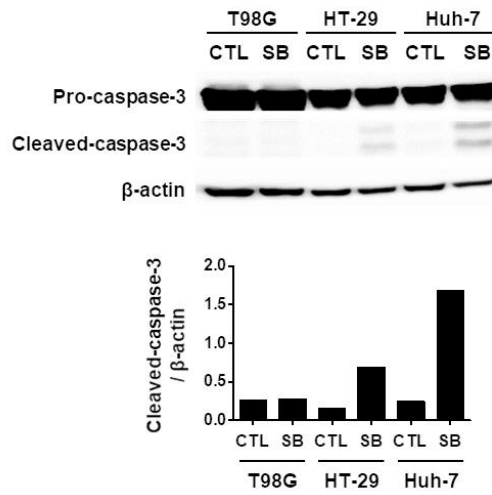

**Figure S4.** Effect of SB365 on the cleavage of caspase-3 in T98G cells.

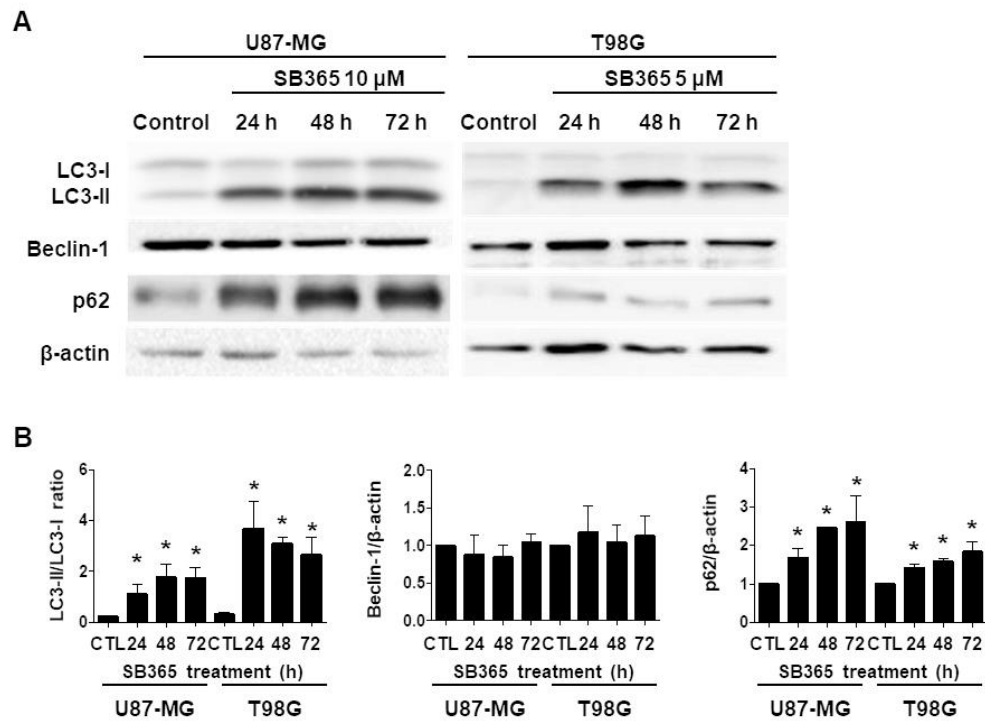

**Figure S5.** Effect of SB365 on the expression of autophagy-related proteins in GBM cells.

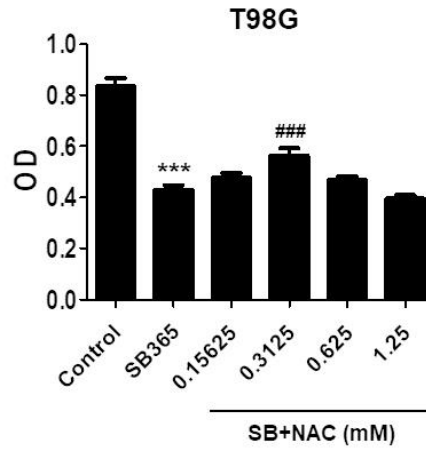

**Figure S6.** Recovery of SB365-induced cell death by antioxidant, NAC, in T98G cells.

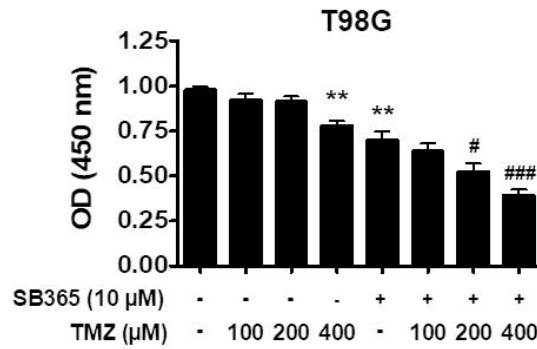

**Figure S7.** Cytotoxic effect of SB365 and TMZ on T98G cells.

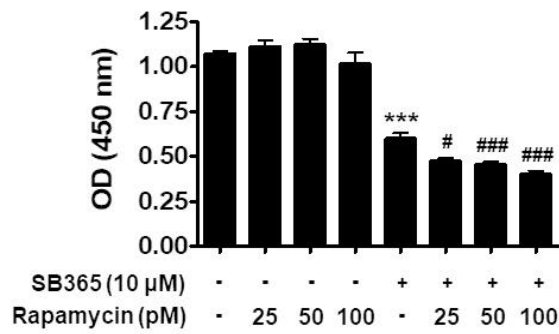

**Figure S8.** Augmentation of SB365 cytotoxicity by rapamycin pre-treatment.

**Table S1.** Cell proliferation in U87-MG cells treated with SB365 and/or TMZ.

| Viability reduction ratio in U87-MG cells (%) |             |              |
|-----------------------------------------------|-------------|--------------|
|                                               | TMZ only    | with SB365   |
| Control                                       | 0 (±13)     | 28.7 (±12.2) |
| 6.25 µM                                       | 5.9 (±17.7) | 46.3 (±10)   |
| 12.5 µM                                       | 9.8 (±14.2) | 48.5 (±10.1) |
| 25 µM                                         | 36.8 (±8.3) | 56.5 (±5.7)  |
| 50 µM                                         | 45.9 (±7.5) | 63.6 (±9.9)  |
